# Supplementary material for: Tumorous expression of NAC1 restrains antitumor immunity through the LDHA-mediated immune evasion
Source: PubMed Central journal article supplement — J Immunother Cancer. 2022 Sep 23;10(9):e004856. doi: 10.1136/jitc-2022-004856 (PMC9511653; doi:10.1136/jitc-2022-004856), 2022-09-23
Supplement: jitc-2022-004856supp009.pdf [file jitc-2022-004856supp009.pdf]

**Extended Table 1**

| Gene  | For (5'-3')          | Rev (5'-3')          |
|-------|----------------------|----------------------|
| GAPDH | GTTGTCTCCTGCGACTTCA  | GGTGGTCCAGGGTTTCTTA  |
| HK2   | CACCAAGCTGAAGGAGGACC | CTGGAATGGCCCTGACGAAT |
| LDHA  | CGTGCACTAGCGGTCTCAAA | GGAGATCCATCATCTCGCCC |
| LDHB  | GTGTCCGCACTTTCCTGAG  | CGGATTCACCCGTGTCTAC  |
| LDHC  | GTTTCTTACCTGTGCTGCGG | AGGGCAAGTTCATCAGCAA  |
