# Supplementary material for: Tumorous expression of NAC1 restrains antitumor immunity through the LDHA-mediated immune evasion
Source: PubMed Central journal article supplement — J Immunother Cancer. 2022 Sep 23;10(9):e004856. doi: 10.1136/jitc-2022-004856 (PMC9511653; doi:10.1136/jitc-2022-004856), 2022-09-23
Supplement: jitc-2022-004856supp010.pdf [file jitc-2022-004856supp010.pdf]

## Supplementary figure legends

**Supplementary Figure 1. Flow cytometric analyses for the generation of NAC1-deficient tumor cells.** (A) Cell sorting of NAC1/Cas9 plasmid-transfected mouse B16-OVA cells, gating on RFP+. (B) Cell sorting of NAC1/Cas9 plasmid-transfected human A2058 melanoma cells, gating on RFP+. (C) Viable cell numbers at day 0, day 1, day 2, and day 3 of mouse WT B16-OVA and NAC1 KO B16-OVA cells. (D) Viable cell numbers at day 0, day 1, day 2, and day 3 of human WT A2058 and NAC1 KO A2058 tumor cells. Data are the representatives of three identical experiments.

**Supplementary Figure 2. Generation of tyrosinase-specific human CD8+ T cells.** Human CD8+ T cells from human peripheral blood mononuclear cells (PBMCs) were retrovirally transduced with tyrosinase-specific TCR genes and analyzed for tyrosinase-specific TCR expression by the tetramer staining. Data is the representative of three identical experiments.

**Supplementary Figure 3. Flow cytometric analysis of PD-1+TIM-3+ CD8+ T cells under treatment with WT B16-OVA CM or NAC1 KO B16-OVA CM.** (A) After incubation with WT B16-OVA conditional medium (CM) or NAC1 KO B16-OVA CM for 24 hours, expression of TIM-3 on the live CM-treated OT-I CD8+ T cells was assessed by flow cytometry. One representative dot plot and bar graph of expression that were collected from three replicates experiment is shown. \*\*\*,  $P \leq 0.001$  (B) Flow cytometric histogram analyses of TNF- $\alpha$ , IFN- $\gamma$ , PD-1 and TIM-3 of CD8+ T cells after incubation in the CM obtained from mouse melanoma cells in combination with 2mM or 5mM of LA. (C) Flow cytometric histogram analyses of IFN- $\gamma$ , TNF- $\alpha$ , Granzyme B, and PD-1 of CD8+ T cells after incubation in the indicated CM of mouse melanoma cells. (D) Flow cytometric gating strategy for analyzing the exhausted T cell (TIM-3+) with the WT or NAC1 KO B16-OVA CM for 24 hours. Representative flow cytometric dot plot collected from three replicate experiments is shown.

**Supplementary Figure 4. Histological analyses of tumor CTL infiltration.** (A) H&E staining of mouse WT or NAC1 KO B16-OVA tumor tissues following an ACT of OT-I CD8+ T cells. Scale represents 100  $\mu$ m. (B) H&E staining of human WT or NAC1 KO A2058 tumor tissues following an ACT of human CD8+ T cell transfer. Scale represents 100  $\mu$ m.

**Supplementary Figure 5. Gating strategy for analyses of indicated cytokines and exhaustion markers of CD8+ T cells.** (A) Flow cytometric gating strategy for analyzing the exhausted T cells (PD-1+, TIM-3+), and cytokine production (IFN- $\gamma$ , Granzyme B, and TNF- $\alpha$ ) of CD8+ T cells with the treatment strategy indicated in Figure 5A & 5C. Representative flow cytometric dot plots collected from three replicate experiments is shown. (B) Flow cytometric gating strategy for analyzing the cytokine production (IL-2, Granzyme B) of CD8+ T cells in tumor tissues for flow cytometric analyses. Representative dot plot collected from three replicate experiments is shown.

**Supplementary Figure 6. Immunoblotting analysis of LDHA overexpression.** Overexpression of LDHA by retrovirus-mediated transduction in NAC1 KO tumor cells was examined by Western blots. LDHA and b-actin are shown. (A) Mouse NAC1 KO B16-OVA. (B) Human NAC1 KO A2058 cells.

**Supplementary Figure 7. Gating strategy for analyses of infiltrating CD8+ T cells in WT or NAC1 KO B16-OVA tumor tissues.** Flow cytometric gating strategy for analyzing the exhausted T cells (PD-1+, TIM-3+), and cytokine production (IL-2, Granzyme B) of Thy1.2+ CD8+ T cells in tumor tissues.

**Supplementary Figure 8. Gating strategy for infiltrating CD8+ T cells in WT or NAC1 KO A20258 tumor tissues. (A)** Flow cytometric gating strategy for analyzing IL-2, Granzyme B, and IFN- $\gamma$  of CD8+ T cells in tumor tissues. Representative dot plot collected from three replicate experiments is shown. **(B)** Flow cytometric gating strategy for analyzing PD-1 and TIM-3 of CD8+ T cells in tumor tissues. Representative dot plot collected from three replicate experiments is shown.
