# Supplementary figures and images for: Tumorous expression of NAC1 restrains antitumor immunity through the LDHA-mediated immune evasion
Source: PubMed Central journal article supplement — J Immunother Cancer. 2022 Sep 23;10(9):e004856. doi: 10.1136/jitc-2022-004856 (PMC9511653; doi:10.1136/jitc-2022-004856), 2022-09-23

## Extended Figure 1

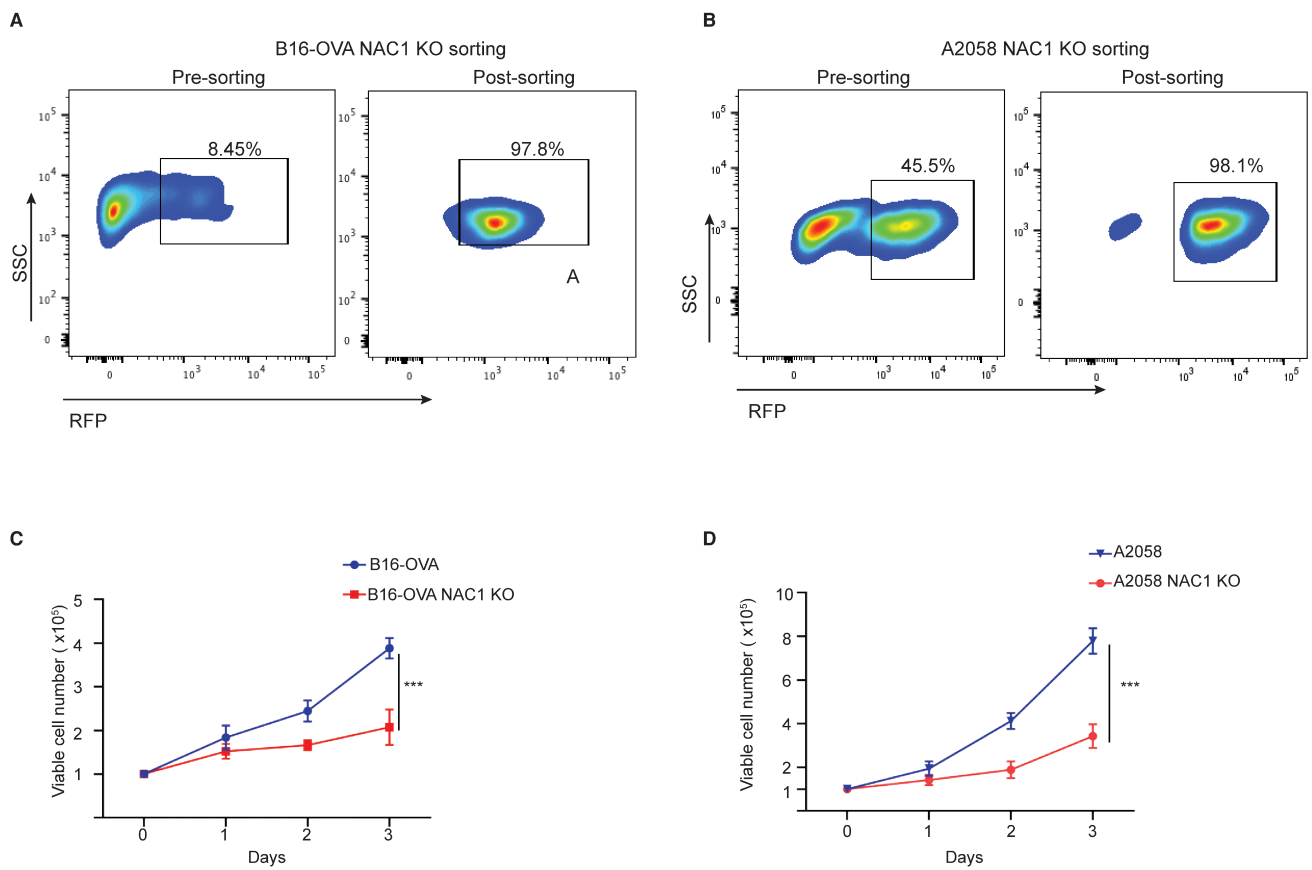

Supplement: jitc-2022-004856supp001.pdf [file jitc-2022-004856supp001.pdf]

## Extended Figure 2

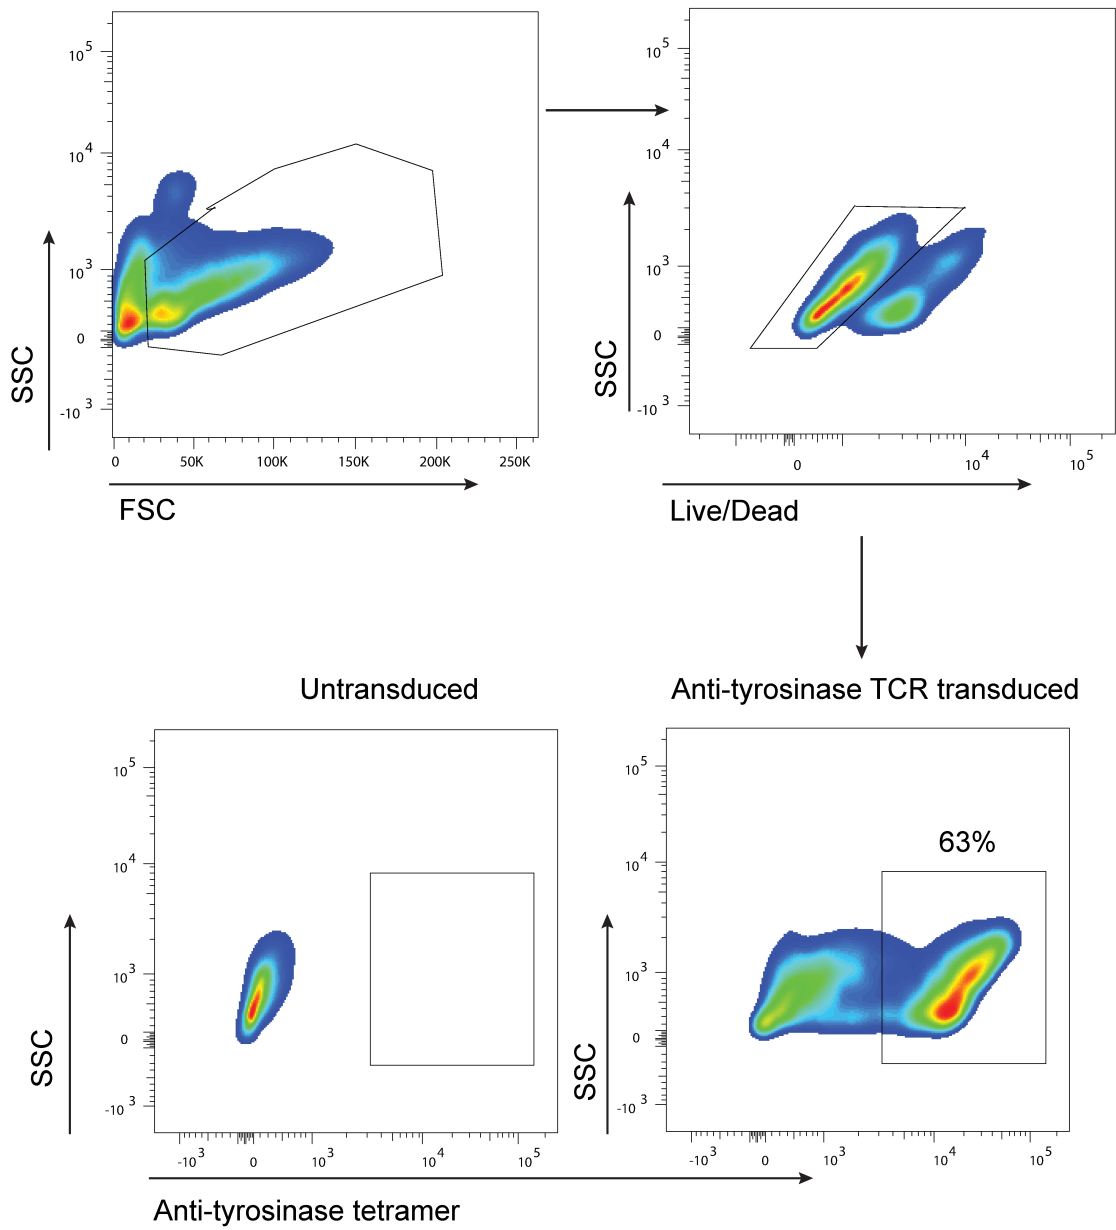

Supplement: jitc-2022-004856supp002.pdf [file jitc-2022-004856supp002.pdf]

## Extended Figure 3

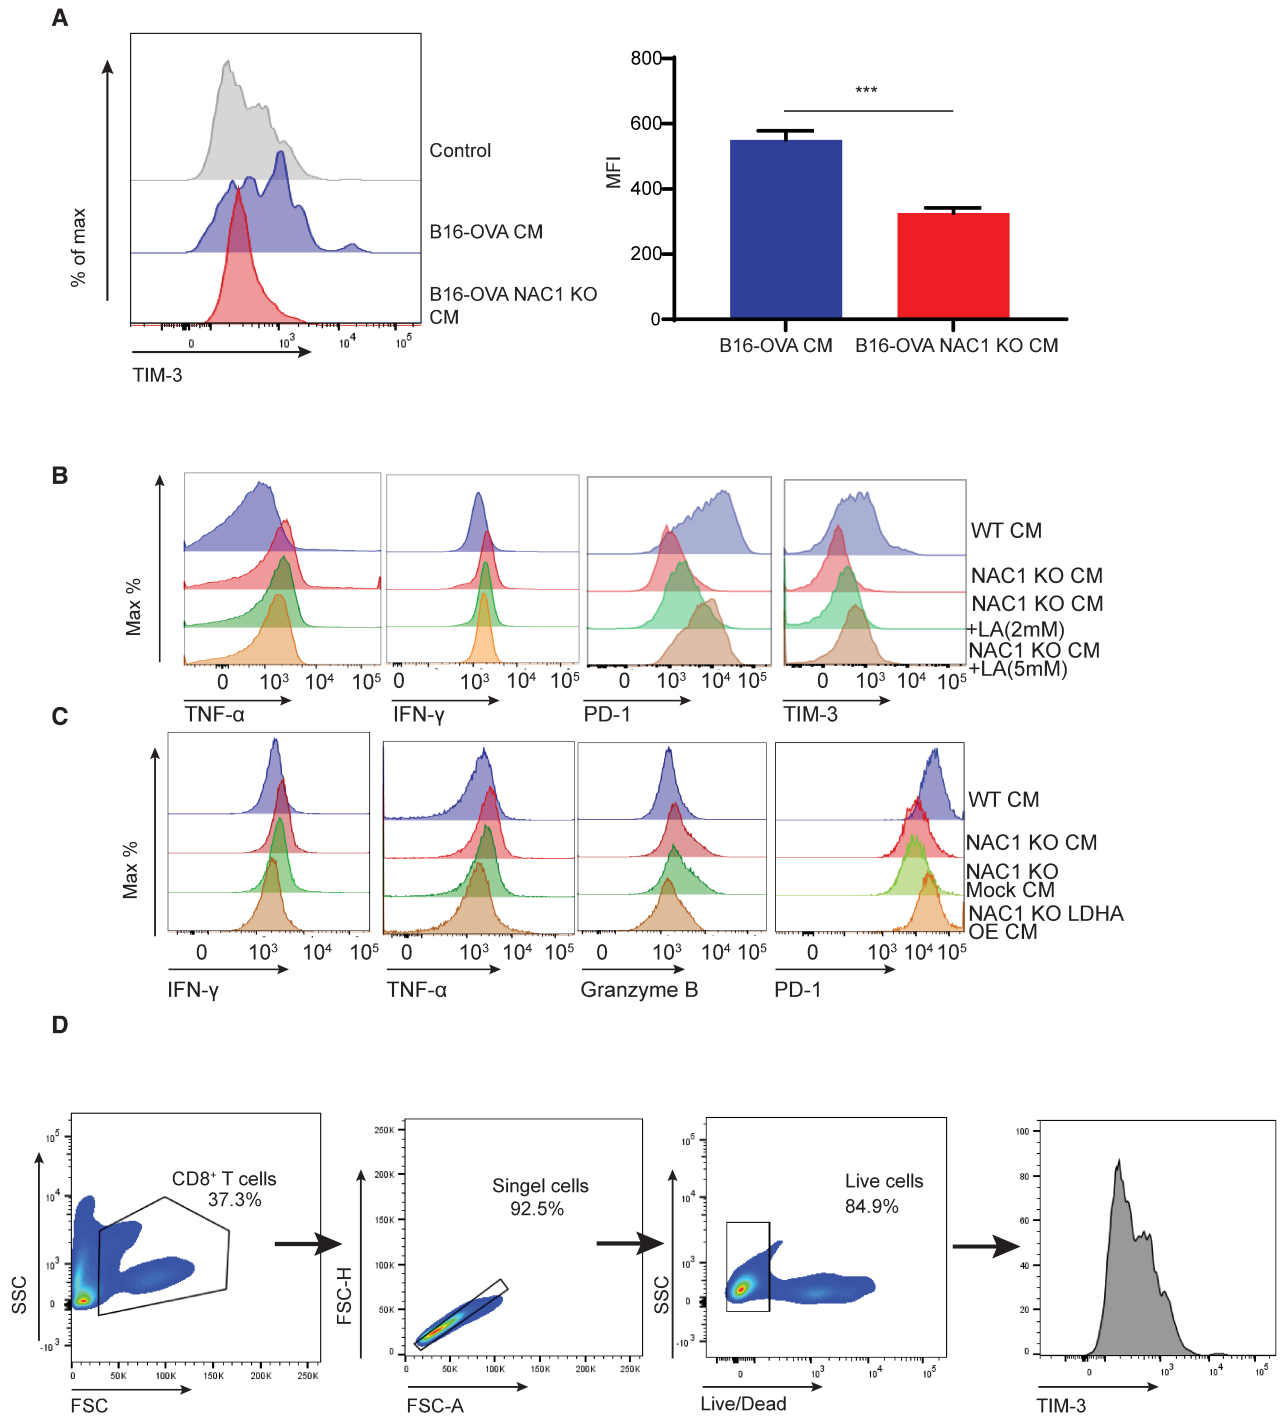

Supplement: jitc-2022-004856supp003.pdf [file jitc-2022-004856supp003.pdf]

## Extended Figure 4

A

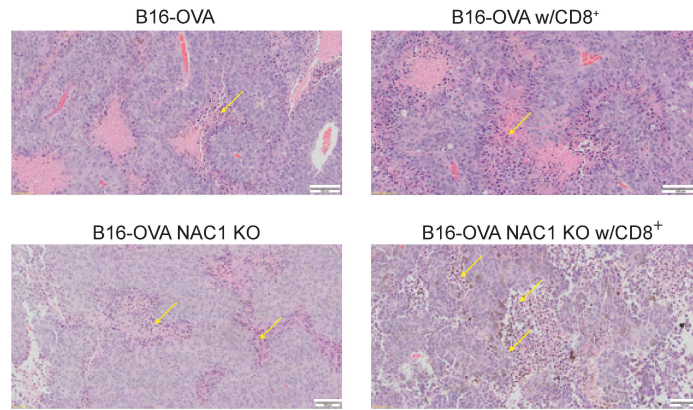

B

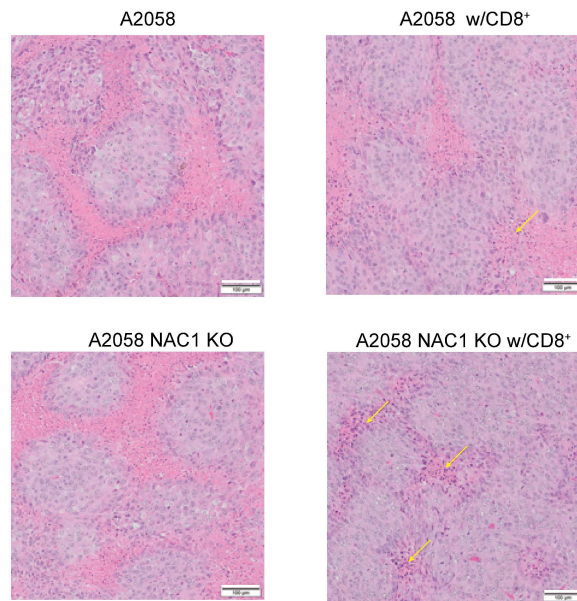

Supplement: jitc-2022-004856supp004.pdf [file jitc-2022-004856supp004.pdf]

Extended Figure 5

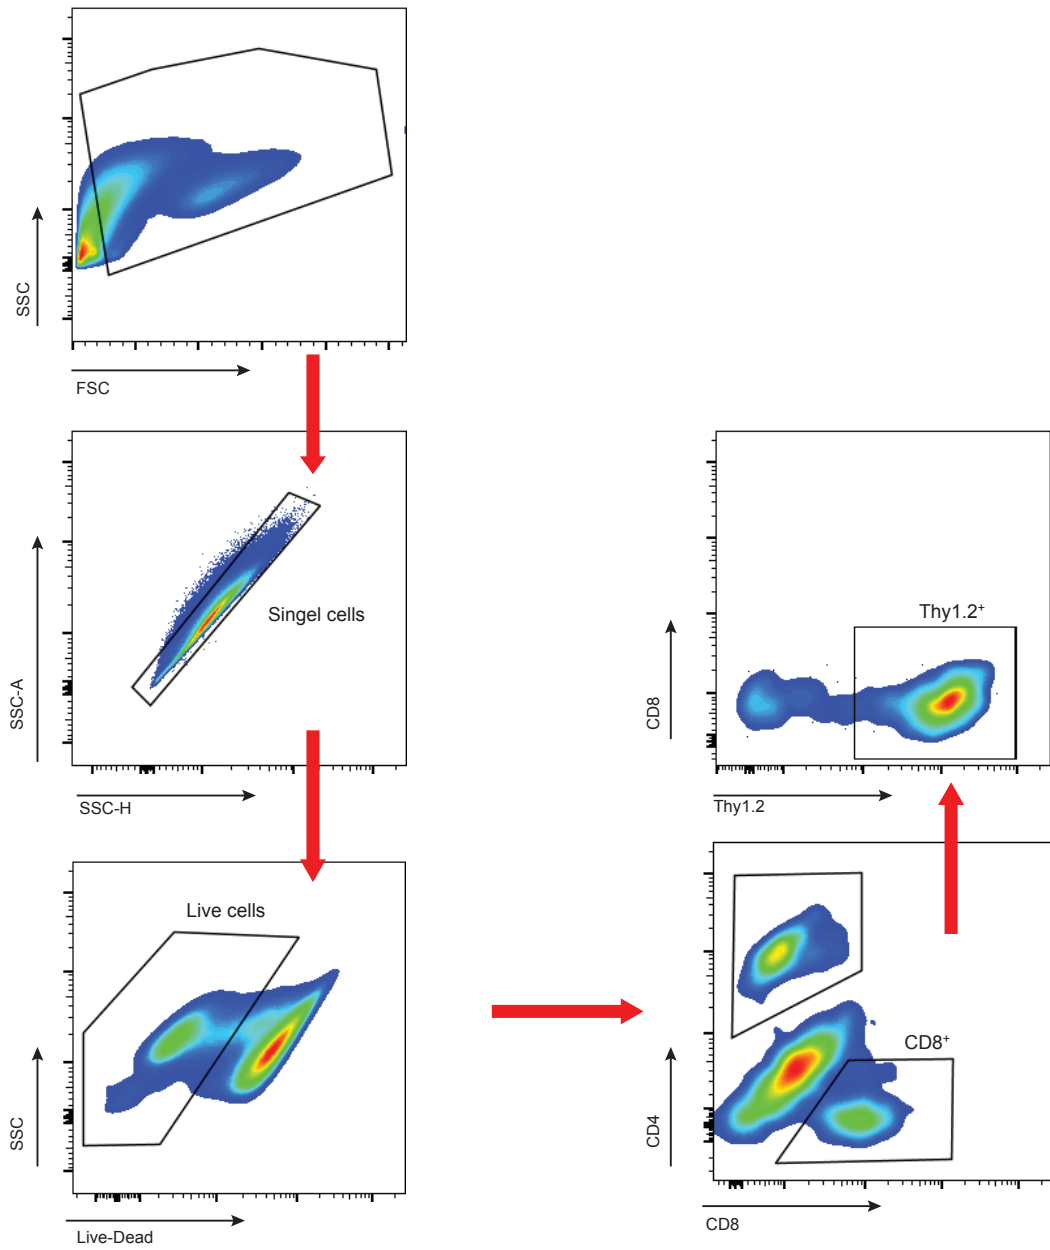

Supplement: jitc-2022-004856supp005.pdf [file jitc-2022-004856supp005.pdf]

**Extended Figure 6****A**

|         |   |   |   |   |
|---------|---|---|---|---|
| LDHA OE | - | - | - | + |
| Mock    | - | - | + | - |
| NAC1 KO | - | + | + | + |

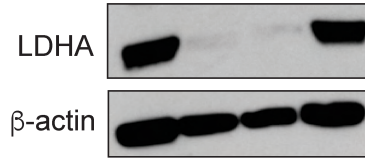

B16-OVA

**B**

|         |   |   |   |   |
|---------|---|---|---|---|
| LDHA OE | - | - | - | + |
| Mock    | - | - | + | - |
| NAC1 KO | - | + | + | + |

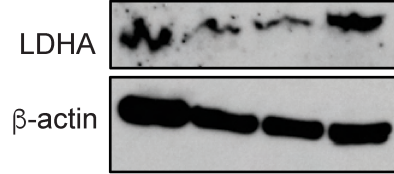

A2058

Supplement: jitc-2022-004856supp006.pdf [file jitc-2022-004856supp006.pdf]

## Extended Figure 7

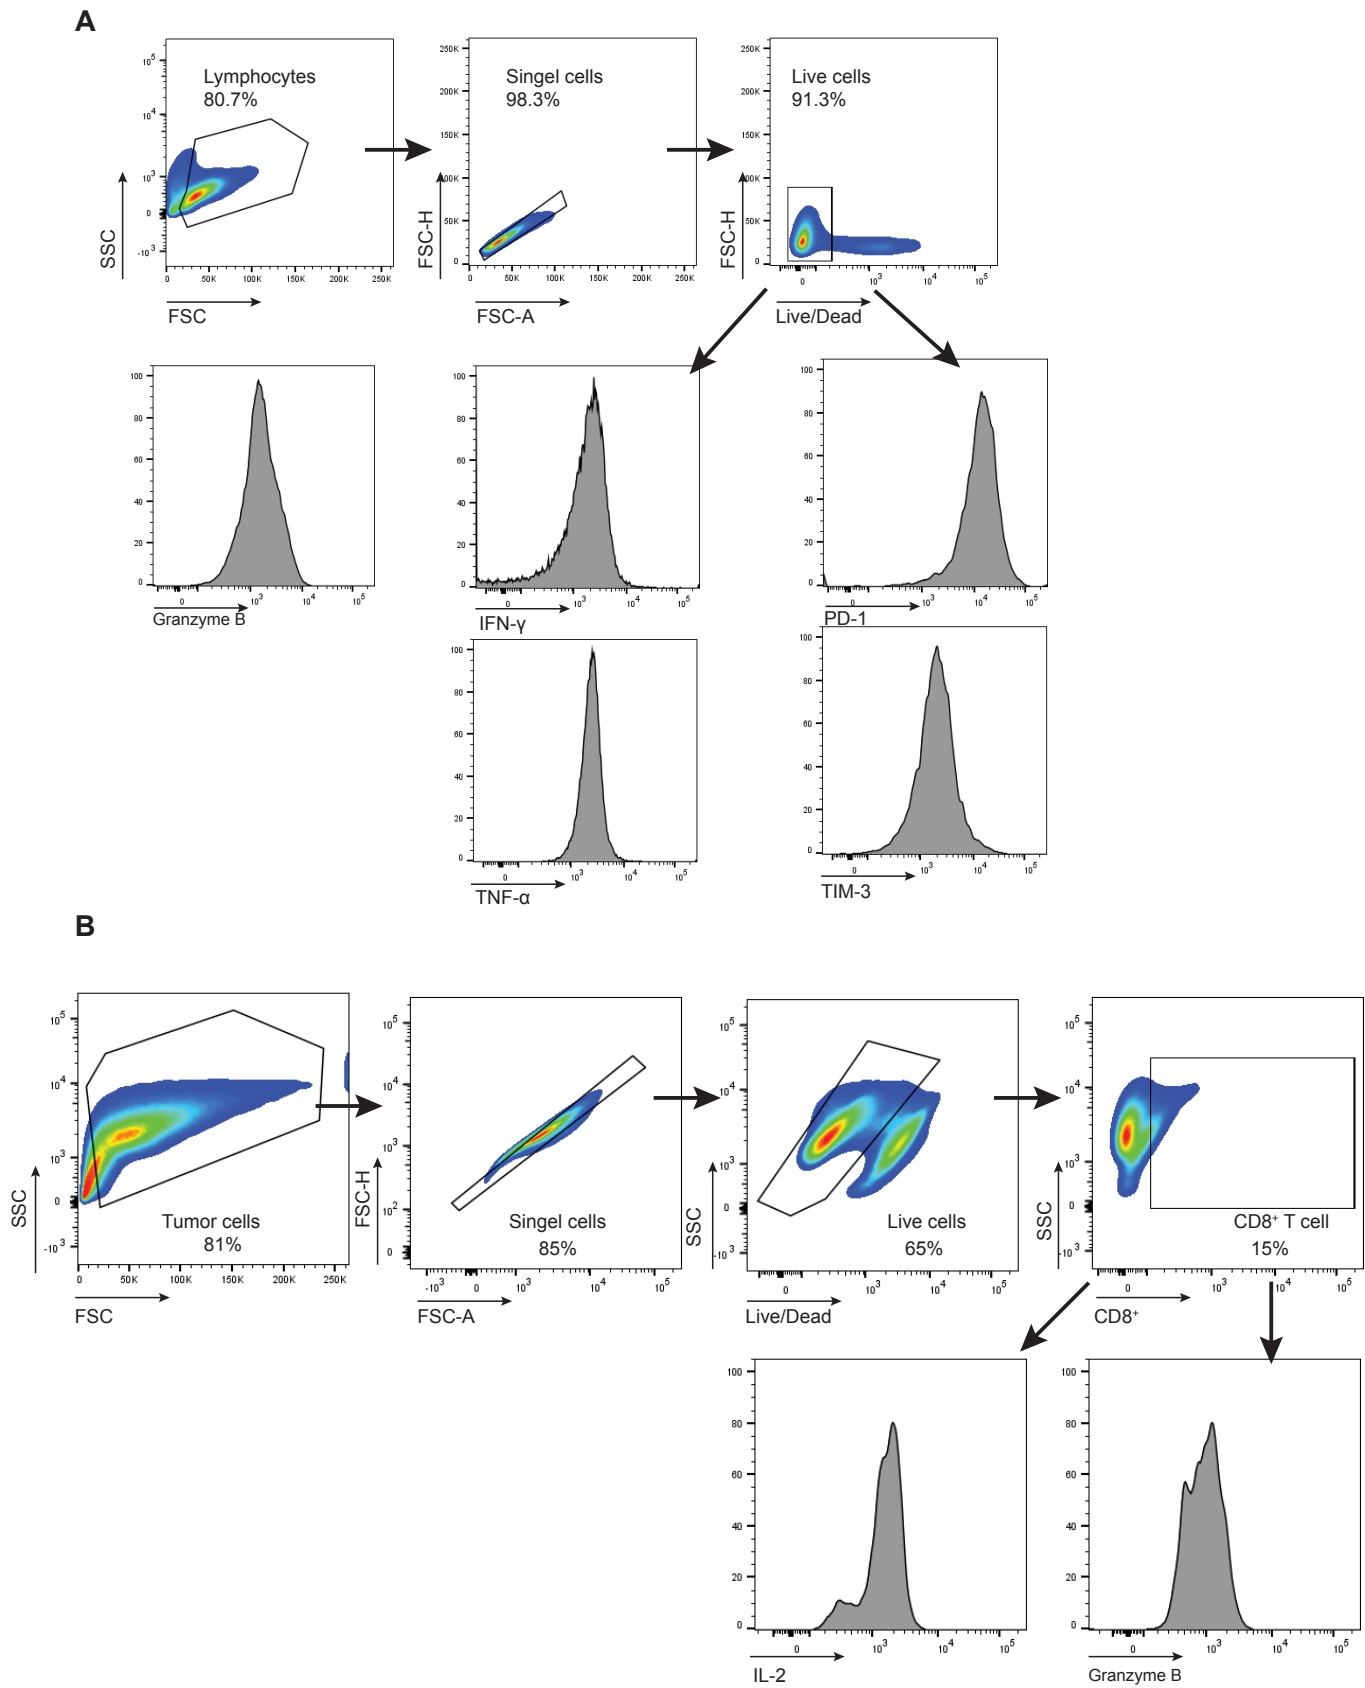

Supplement: jitc-2022-004856supp007.pdf [file jitc-2022-004856supp007.pdf]

**Extended Figure 8**

**A**

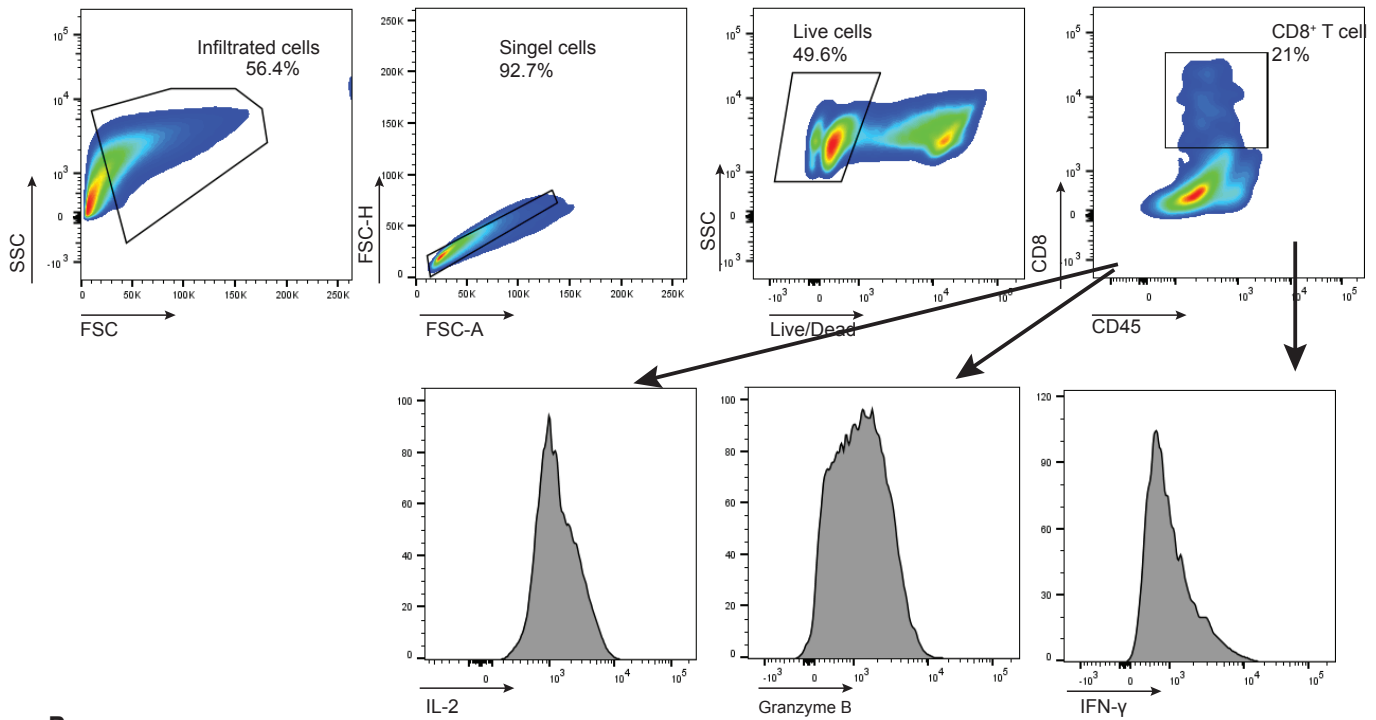

**B**

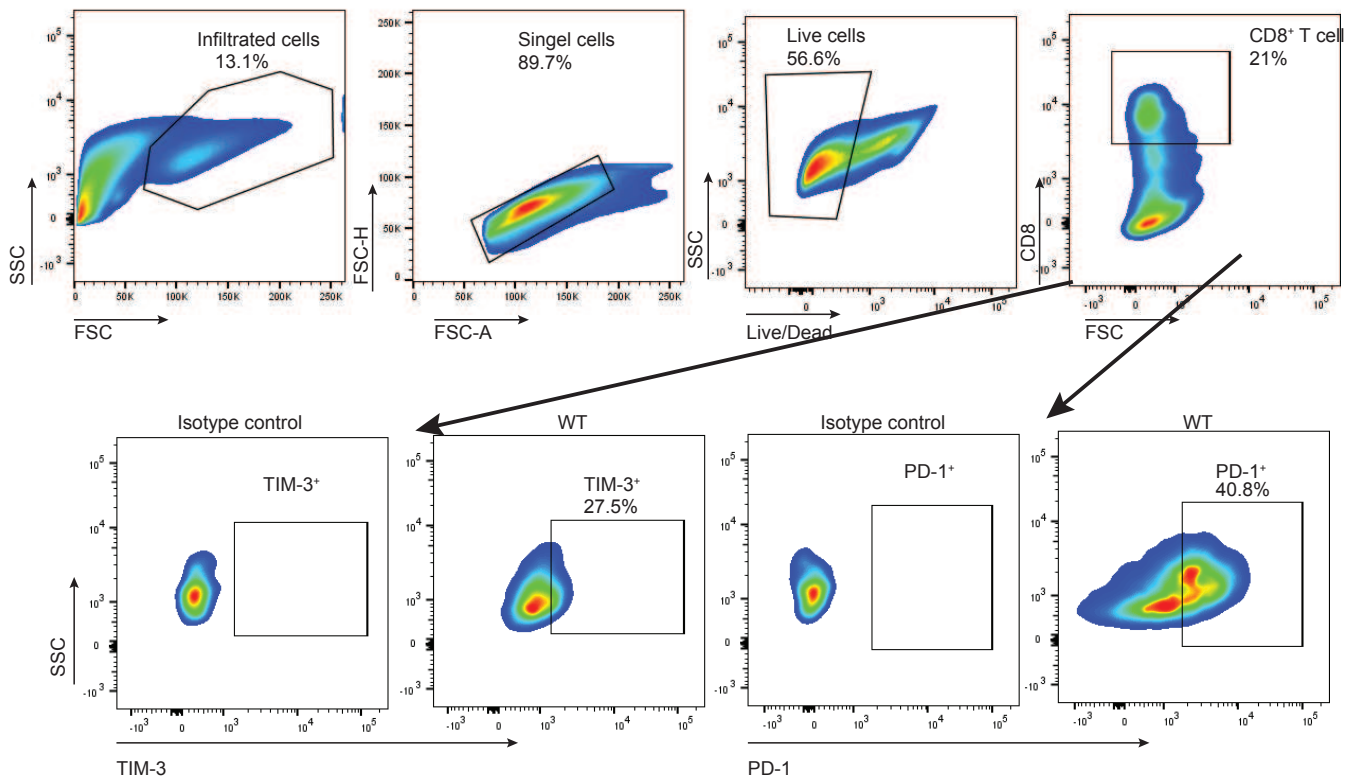

Supplement: jitc-2022-004856supp008.pdf [file jitc-2022-004856supp008.pdf]
